# Supplementary material for: Hybrid gels by combining low molecular weight glycolipid gelators with agarose: a promising soft material for efficient dye removal
Source: Royal Society of Chemistry journal article supplement (doi:10.1039/d3nj05119f), 2024-01-01
Supplement: d3nj05119f1.pdf [file d3nj05119f1.pdf]

Supporting Information of

**Hybrid Gels by Combining Low Molecular Weight Glycolipid  
Gelator with Agarose: A Promising Soft Material for Efficient  
Dye Removal**

*Snehal Ashokrao Holey,<sup>a,b</sup> and Rati Ranjan Nayak<sup>a,b,c\*</sup>*

<sup>a</sup>Department of Oils, Lipid Science and Technology, CSIR-Indian Institute of Chemical  
Technology, Hyderabad-500 007, India.

<sup>b</sup>Academy of Scientific and Innovative Research (AcSIR), Ghaziabad-201002, India.

<sup>c</sup>Present address: CSIR-Institute of Minerals and Materials Technology, Bhubaneswar-  
751013, Odisha, India

\*Corresponding Author: E-mail: [rrnayak@iict.res.in](mailto:rrnayak@iict.res.in)

The supporting information contains:

3 Pages

3 Figures

2 Tables

**Table S1.** Gelation behavior glycolipids in different solvents

| Solvent     | PHY-G          | PHY-L | Solvent                           | PHY-G          | PHY-L      |
|-------------|----------------|-------|-----------------------------------|----------------|------------|
| Pentane     | I              | I     | Dioxane                           | S <sup>a</sup> | I          |
| Hexane      | I              | I     | THF                               | S <sup>a</sup> | I          |
| Cyclohexane | I              | I     | Water                             | PS             | PS         |
| Toluene     | S <sup>a</sup> | I     | Methanol                          | S              | S          |
| Xylene      | S <sup>a</sup> | I     | DMF                               | S              | S          |
| Chloroform  | S <sup>a</sup> | I     | DMSO                              | S              | S          |
| Acetone     | S <sup>a</sup> | I     | DMF:Water <sup>b</sup> (1:1)      | P              | P          |
| Ethanol     | S <sup>a</sup> | I     | DMSO:Water <sup>b</sup> (1:1)     | G              | G          |
|             |                |       |                                   | (9 mg/mL)      | (15 mg/mL) |
| Propan-2-ol | S <sup>a</sup> | I     | Methanol:Water <sup>b</sup> (1:1) | P              | P          |

S: soluble; S<sup>a</sup>: soluble on heating; PS: Partially soluble; I: Insoluble; G: gel; P: Precipitate; <sup>b</sup>heating-cooling method.

**Table S2.** Individual component concentrations used in the preparation of hybrid gels (1 mL).

| Sample          | Agarose in 0.5 mL water | Glycolipid in 0.5 mL DMSO |
|-----------------|-------------------------|---------------------------|
| <b>Ag-DMSO</b>  | 20 mg                   | -                         |
| <b>Ag-PHY-G</b> | 20 mg                   | 9 mg                      |
| <b>Ag-PHY-L</b> | 20 mg                   | 15 mg                     |

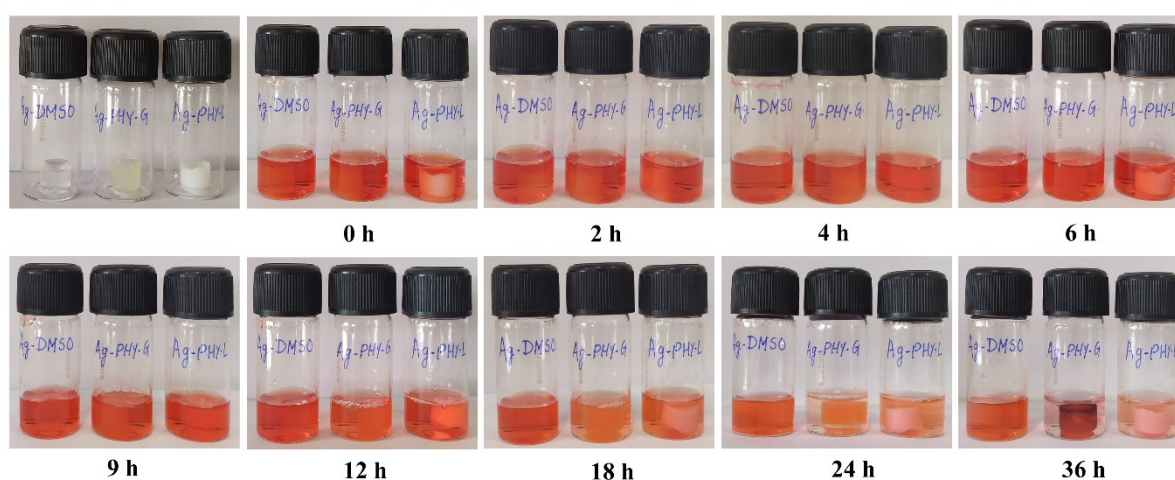**Fig. S1** Photographs of hybrid gels showing time-based adsorption of Congo red.

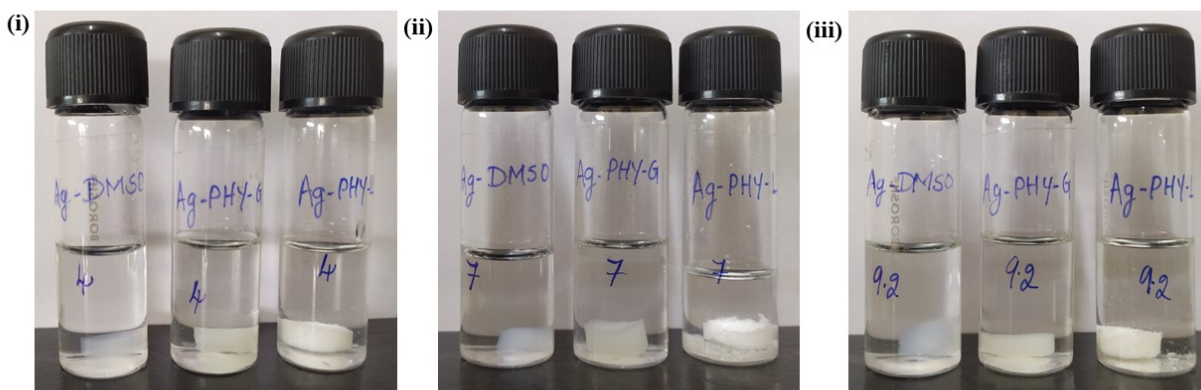

**Fig. S2** Photographs of vials displaying stability of hybrid gel at different pH (4, 7, 9.2) after two days.

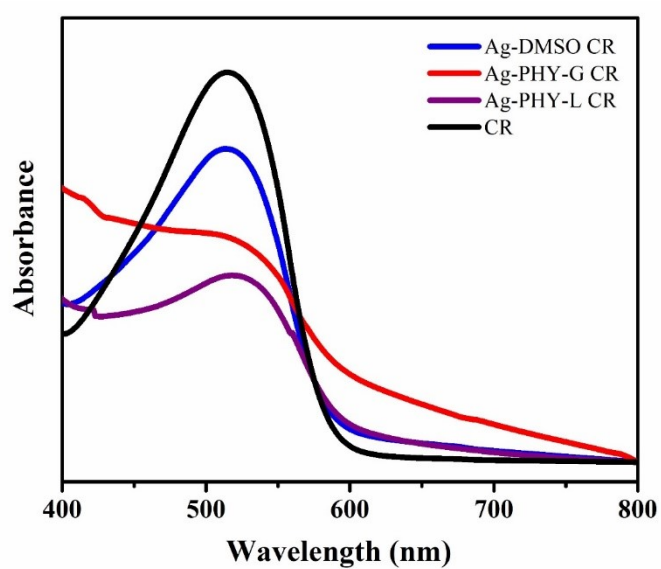

**Fig. S3** UV-visible spectrum of Congo red and dye-incorporated hybrid gels.
